# Supplementary material for: Major Orthopaedic Surgery in Persons with Haemophilia A with and without Inhibitors Treated by Emicizumab: A Mid-Term, Large, and Successful Series at a Single Center
Source: MDPI journal article supplement (doi:10.3390/jcm13092646), 2024-04-30
Supplement: s1 [file s1]

**Table S1: Demographic patient's data**

|                                                    |                                 |
|----------------------------------------------------|---------------------------------|
| <b>Number of patients</b>                          | 13                              |
| <b>Age</b> (mean/range)                            | 54.6 years (32-66)              |
| <b>Type of Haemophilia</b>                         |                                 |
| <b>A severe</b>                                    | 12                              |
| <b>A moderate</b>                                  | 1                               |
| <b>Haemophilia Joint Health Score</b> (mean/range) | Pre-op: 18.4 (16-22)            |
| <b>Inhibitors</b>                                  | 8/13 patients                   |
| <b>HCV infections</b>                              | 12/13 patients (11 neutralized) |
| <b>HIV infections</b>                              | 1/13 patients                   |
| <b>Previous surgery</b>                            | 9/13 patients                   |
| <b>Other target joints</b>                         | 13/13 patients                  |

**Table S2: Surgical and clinical data**

| <b>TYPE OF SURGERY</b>            | <b>N° of cases</b> | <b>Complications</b>        | <b>Transfusions</b> | <b>Mean VAS</b><br>Pre/post-op | <b>Mean HJHS</b><br>Pre/post-op | <b>Satisfaction</b>    |
|-----------------------------------|--------------------|-----------------------------|---------------------|--------------------------------|---------------------------------|------------------------|
| <b>Total Knee Arthroplasty</b>    | 5                  | -                           | -                   | 8.3 / 1.1                      | 19.5 / 3.0                      | Full                   |
| <b>Total Hip Arthroplasty</b>     | 2                  | -                           | -                   | 9.1 / 0.8                      | 21.2 / 2.5                      | Full                   |
| <b>Revision Knee Arthroplasty</b> | 2                  | -                           | -                   | 7.5 / 1.3                      | 18.7 / 3.6                      | Full                   |
| <b>Revision Hip Arthroplasty</b>  | 3                  | -                           | 2                   | 7.1 / 1.0                      | 19.0 / 3.1                      | Full                   |
| <b>Pseudotumor excision</b>       | 2                  | 1 (recurrence of infection) | -                   | 6.4 / 2.4                      | 16.6 / 5.3                      | Full (1) / Partial (1) |
| <b>Amputation</b>                 | 1                  | -                           | -                   | 7 / 3                          | 22.0 / 10.4                     | -                      |

Table S3: Comparative results of specific series

| Authors & publication year | N° of major orthopaedic surgeries                                                                                                                                                                     | Type of Haemophilia & Haematological prophylaxis                                                                                                                  | Follow-up         | Complications                                                                                                                                                                                                                                                                                                                                                                          |
|----------------------------|-------------------------------------------------------------------------------------------------------------------------------------------------------------------------------------------------------|-------------------------------------------------------------------------------------------------------------------------------------------------------------------|-------------------|----------------------------------------------------------------------------------------------------------------------------------------------------------------------------------------------------------------------------------------------------------------------------------------------------------------------------------------------------------------------------------------|
| Seaman and Ragni, 2019     | 1 Total Hip Arthroplasty                                                                                                                                                                              | Mild Haemophilia A and high-titre inhibitors<br><br>Emicizumab & rFVIIa                                                                                           | 2 weeks           | None                                                                                                                                                                                                                                                                                                                                                                                   |
| Evans et al, 2020          | 1 Revision Total Knee Arthroplasty (after an infected TKA)                                                                                                                                            | Severe Haemophilia A and high-titre inhibitors<br><br>Emicizumab & rFVIIa                                                                                         | 1 month           | Bleeding during the first day of post-operative rehabilitation                                                                                                                                                                                                                                                                                                                         |
| Guillaume et al, 2021      | 1 Total Elbow Arthroplasty                                                                                                                                                                            | Severe Haemophilia A<br><br>Emicizumab & rFVIII                                                                                                                   | 5 days            | None                                                                                                                                                                                                                                                                                                                                                                                   |
| Renner et al, 2023         | 5 patients (8 procedures):<br>- 4 fixations (1 bilateral)<br>- 1 Total Knee Arthroplasty<br>- 2 below-the-knee amputations<br>- 1 necrectomy after new ankle fusion                                   | Severe Haemophilia A (4 cases)<br>Severe Haemophilia A and high-titre inhibitors (1 cases)<br><br>Emicizumab & rFVIII (no inh)<br>or<br>Emicizumab & rFVIIa (inh) | About 3 years     | <ul style="list-style-type: none"> <li>• 1 severe bleeding in the third day of post-operative rehabilitation needing further surgery (finally, a below-the-knee amputation)</li> <li>• 1 infection (Total Knee Arthroplasty)</li> <li>• 1 infection after ankle fusion (finally, a below-the-knee amputation)</li> <li>• Further surgery after a femoral fracture non-union</li> </ul> |
| Present study              | 13 patients (15 procedures):<br>- 5 Total Knee Arthroplasties<br>- 2 Total Hip Arthroplasties<br>- 2 revision TKAs<br>- 3 revision THAs<br>- 2 pseudotumor excisions<br>- 1 above-the-knee amputation | Severe Haemophilia A (cases)<br>Severe Haemophilia A and high-titre inhibitors (x cases)<br><br>Emicizumab & rFVIII (no inh)<br><br>Emicizumab & rFVIIa (inh)     | More than 3 years | 3 blood transfusions: <ul style="list-style-type: none"> <li>• 2 after 2 revision THA</li> <li>• 1 after an above-the-knee amputation</li> </ul>                                                                                                                                                                                                                                       |
